# Supplementary material
Source: PubMed Central journal article supplement (PMC2678605)
Supplement: 0811250106_0811250106SI.pdf [file 0811250106_0811250106SI.pdf]

# Supporting Information

Huang et al. 10.1073/pnas.0811250106

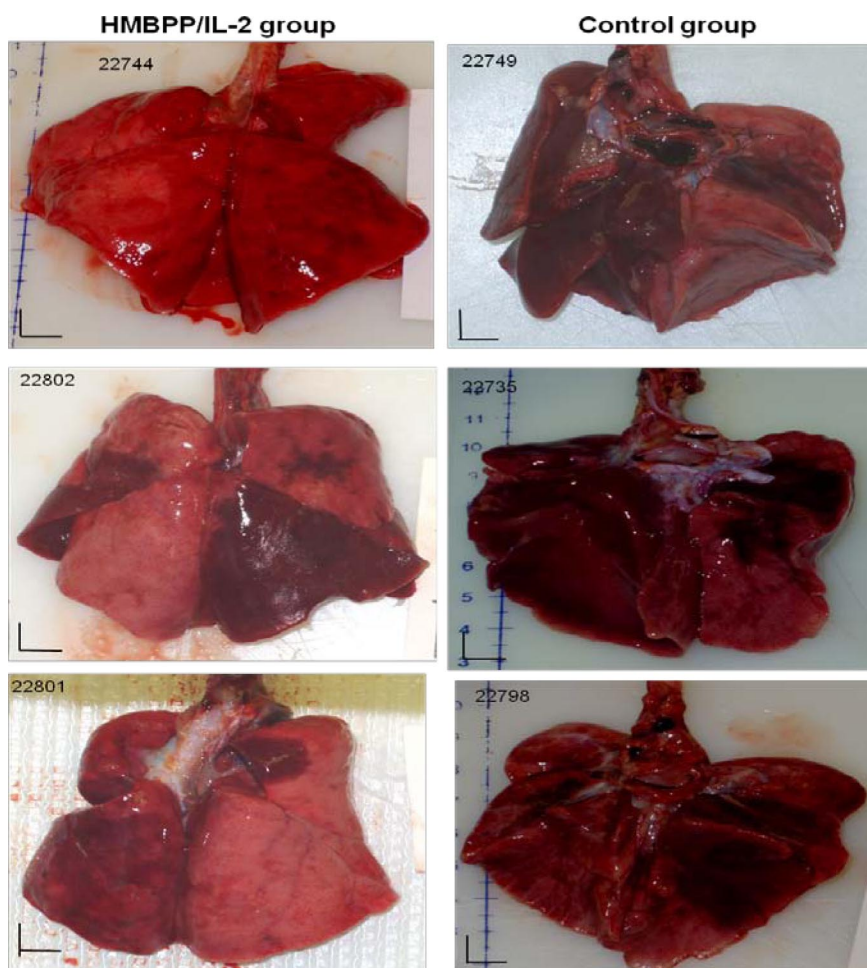

**Fig. S1.** Expansion of  $V\gamma 2V\delta 2$  T cells after the delayed HMBPP/IL-2 treatment resulted in apparent attenuation of pneumonic plague lesions at gross pathology level after pulmonary infection with large-dose *Y. pestis*. Front/back-view pictures show comparisons of gross pathology for additional 3 HMBPP/IL-2 treated monkeys (*Left*) and 3 control monkeys (*Right*).

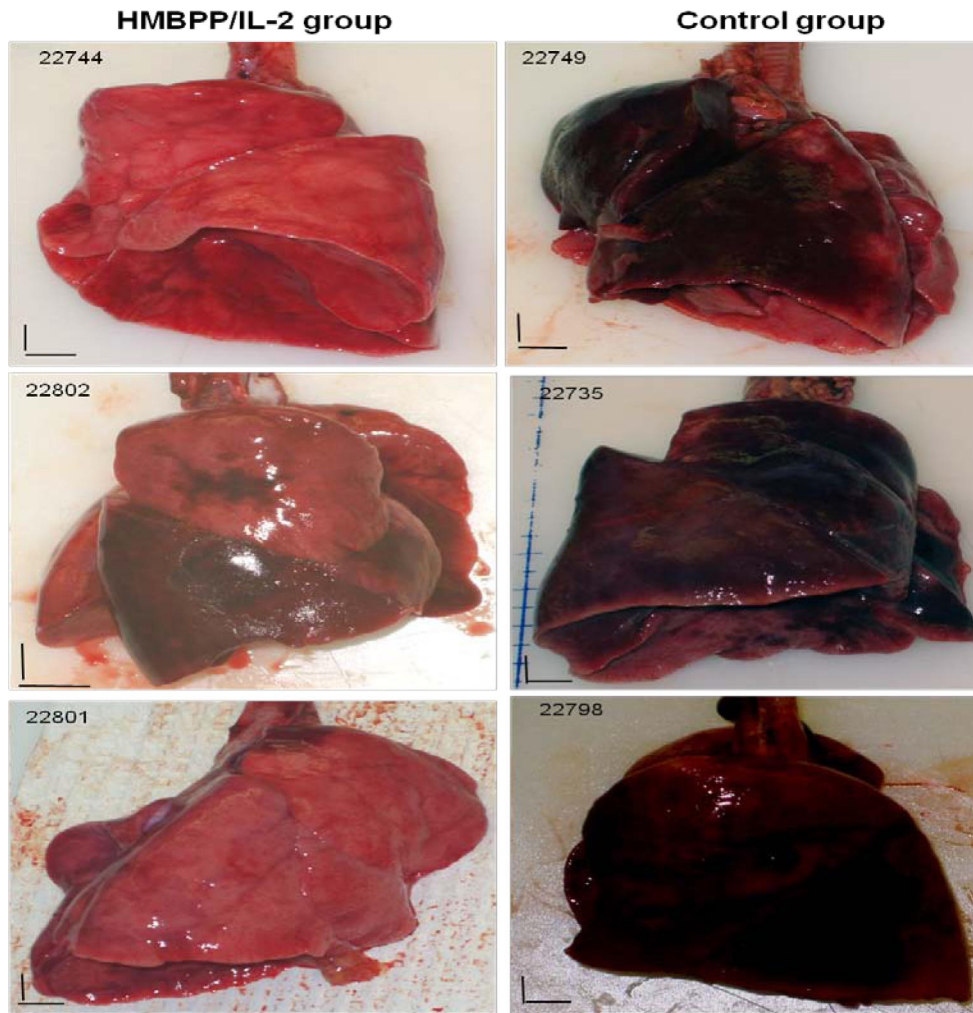

**Fig. S2.** Expansion of V $\gamma$ 2V $\delta$ 2 T cells after the delayed HMBPP/IL-2 treatment resulted in apparent attenuation of pneumonic plague lesions at gross pathology level after pulmonary infection with large-dose *Y. pestis*. The side-view pictures show gross pathology comparisons for the same 6 monkeys from HMBPP/IL-2-treated monkeys (*Left*) and control group (*Right*) groups as shown in Fig. S1.

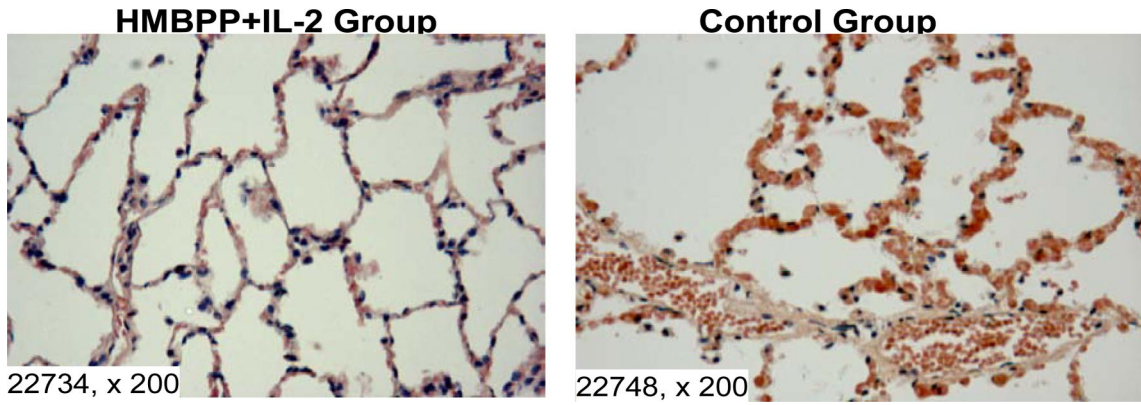

**Fig. S3.** Histology of lung tissue sections from 1 representative survival monkey treated with HMBPP/IL-2 and the 1 survival control monkey treated with glucose only. Note that no hemorrhages or necrosis were seen in lung tissues of the HMBPP/IL-2-treated monkey (22734). Some lymphocytes were seen in alveolar interstitials. In contrast, the control monkey (22748) still exhibited congestion in pulmonary veins and capillaries. Exudates and macrophages remained in alveoli,

### HMBPP/IL-2 Group

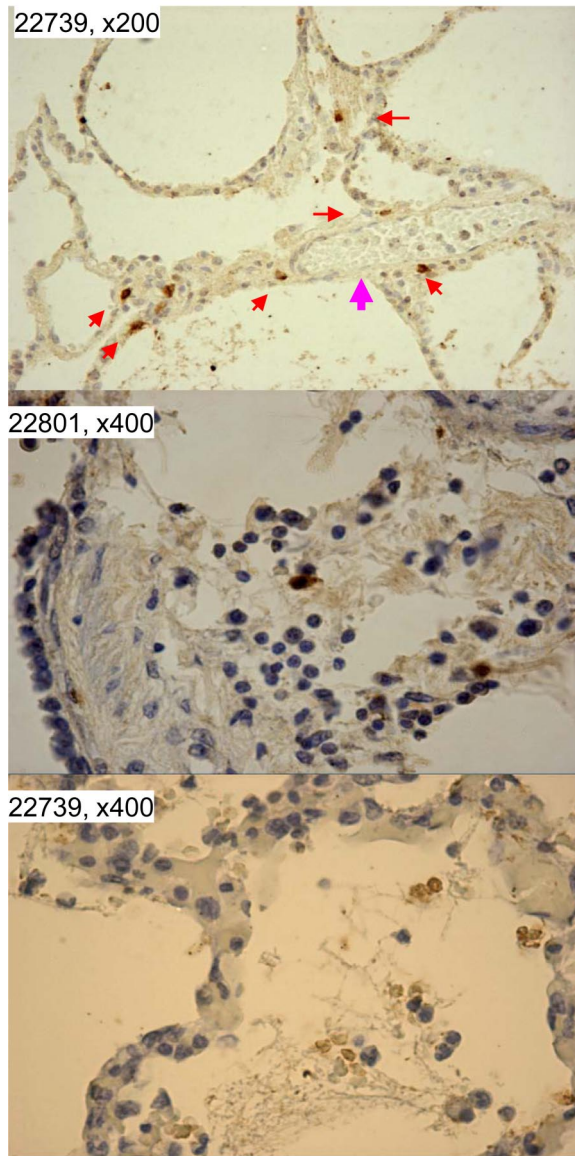

**Fig. S4.**  $V\gamma 2V\delta 2$  T cells were present in the lung tissues with no or mild plague hemorrhages/necrosis in the HMBPP/IL-2-treated macaques. The 3 patterns of  $V\gamma 2V\delta 2$  T cells' localization were also seen in other HMBPP/IL-2-treated monkeys. No  $V\gamma 2V\delta 2$  T cells were detected in lung tissues from control monkeys treated with glucose plus IL-2 or glucose only.

Table S1. Bacterial burdens in blood and lung homogenate after inhalational *Y. pestis* infection

cfu counts/mL

| Animal | Treatment      | Day 5<br>blood | Endpoint            |                     |
|--------|----------------|----------------|---------------------|---------------------|
|        |                |                | Blood               | Lung<br>homogenate* |
| 22744  | HMBPP + IL-2   | 0              | 0 (day 28)          | 0 (day 28)          |
| 22739  | HMBPP + IL-2   | 0              | 1.07E + 09 (day 8)  | 3.43E + 09 (day 8)  |
| 22734  | HMBPP + IL-2   | 0              | 0 (day 28)          | 0 (day 28)          |
| 22742  | HMBPP + IL-2   | 0              | 2.77E + 07 (day 9)  | 1.12E + 06 (day 9)  |
| 22802  | HMBPP + IL-2   | 2.84E + 04     | 1.12E + 09 (day 7)  | 1.57E + 08 (day 7)  |
| 22801  | HMBPP + IL-2   | 2.13E + 08     | 2.13E+(day 5)       | 5.87E + 06 (day 5)  |
| 22746  | Glucose + IL-2 | 3.13E + 07     | 4.87E + 07 (day 7)  | 5.37E + 08 (day 7)  |
| 22749  | Glucose + IL-2 | 1.66E + 06     | 4.33E + 07 (day 7)  | 7.50E + 07 (day 7)  |
| 22811  | Glucose + IL-2 | 0              | 5.43E + 06 (day 10) | 1.21E + 09 (day 10) |
| 22748  | Glucose        | 0              | 0 (day 28)          | 0 (day 28)          |
| 22735  | Glucose        | 0              | 3.40E + 07 (day 8)  | 7.50E + 08 (day 8)  |
| 22798  | Glucose        | 6.69E + 05     | 1.61E + 08 (day 7)  | 4.20E + 07 (day 7)  |

\*Fifteen milliliters of lung homogenate was analyzed.
